# Supplementary material for: Development of a Prognostic Tool to Guide the Decision to Extend Adjuvant Aromatase Inhibitors for up to Ten Years in Postmenopausal Early Breast Cancer Patients
Source: MDPI journal article supplement (doi:10.3390/cancers12123725), 2020-12-11
Supplement: s1 [file s1]

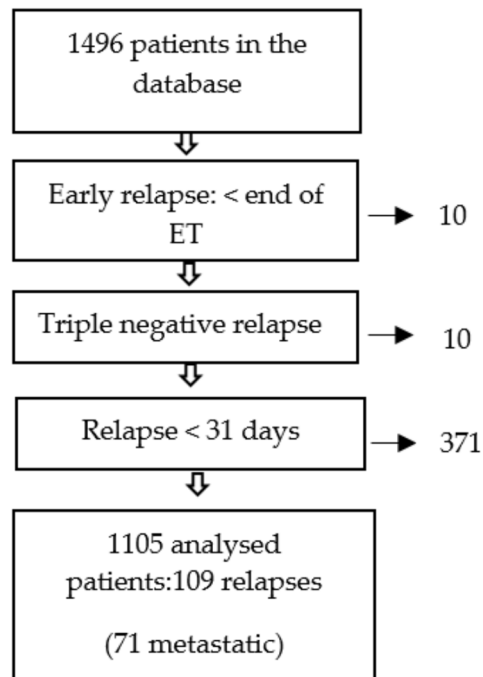

Figure S1. Flow chart.
